# Supplementary material for: Sirt1 interaction with active Smad2 modulates transforming growth factor-β regulated transcription
Source: PubMed Central journal article supplement (PMC5706420; doi:10.1186/s12964-017-0205-y), 2017-11-29

**a**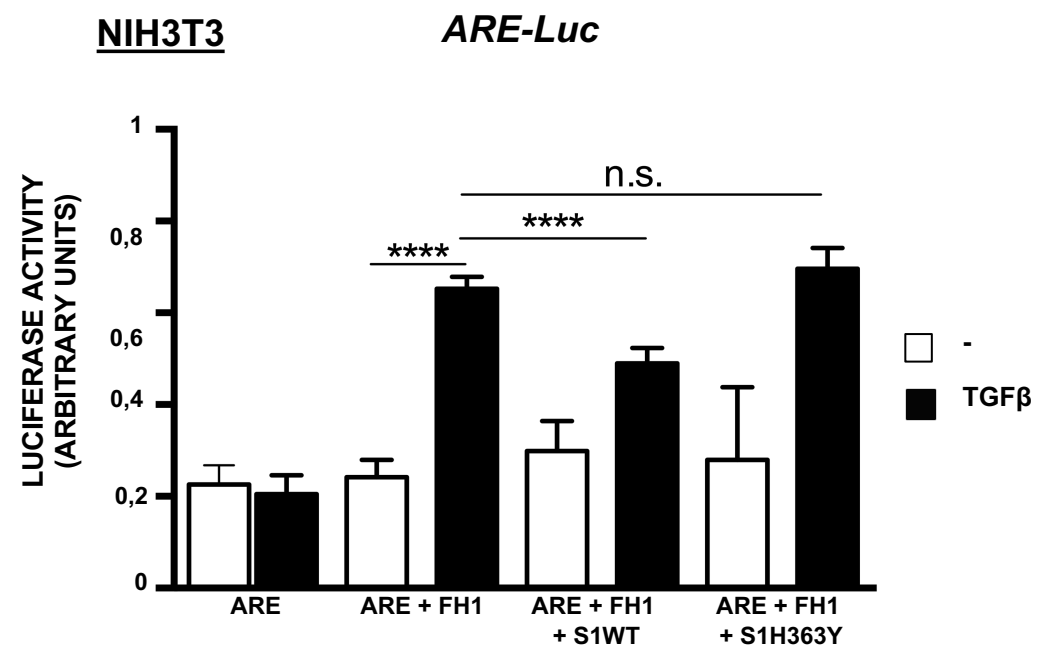**b**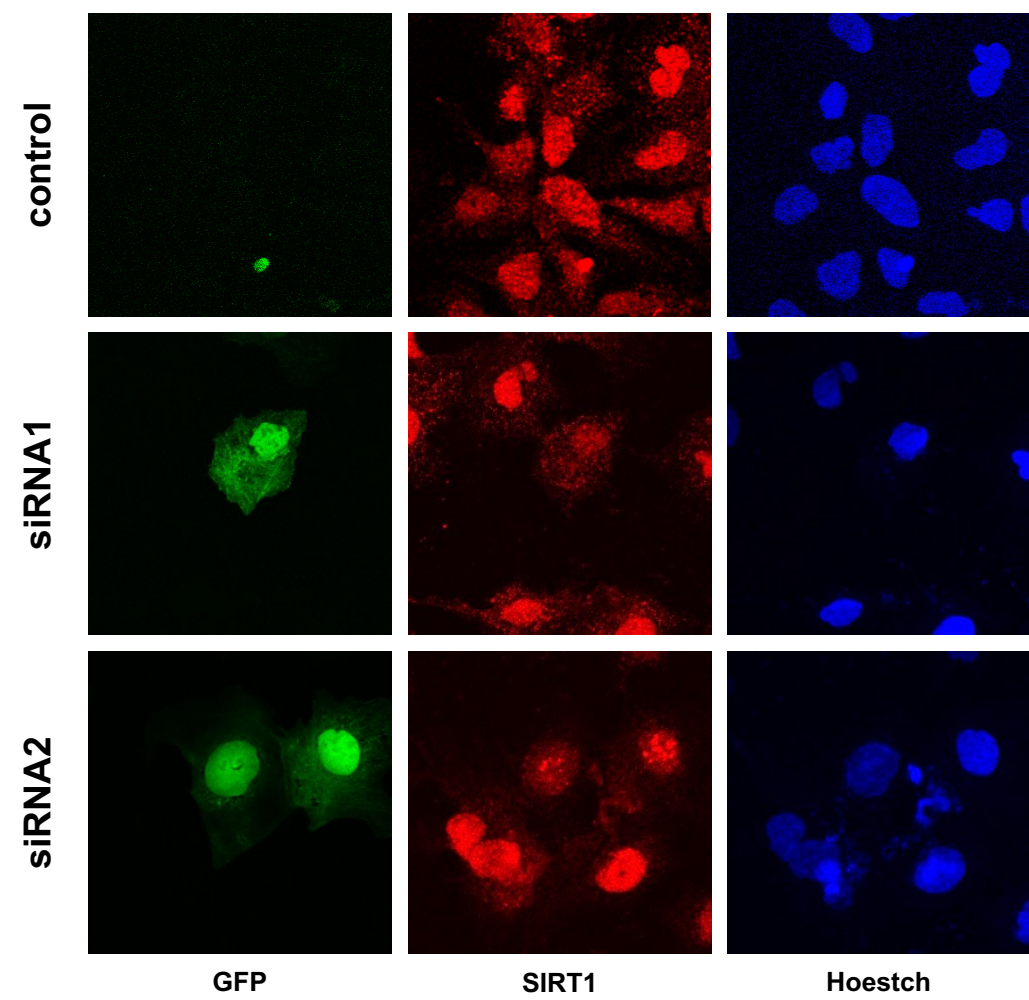**c**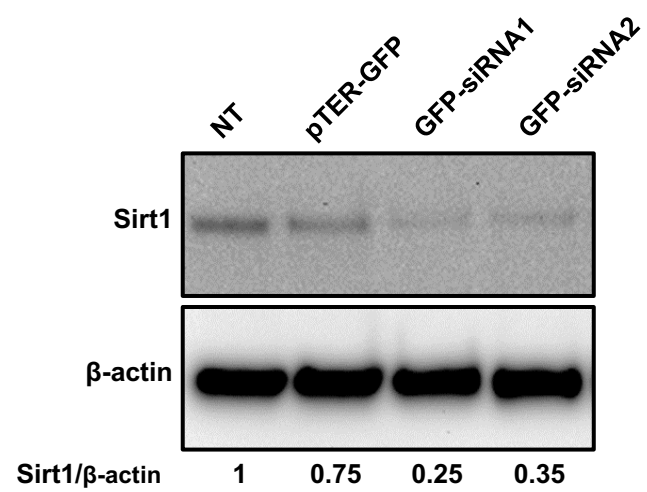

Supplement: 12964_2017_205_MOESM3_ESM.pdf [file 12964_2017_205_MOESM3_ESM.pdf]
